# Supplementary material for: Healthcare worker knowledge and skills following coaching in WHO early essential newborn care program in the Solomon Islands: a prospective multi-site cohort study
Source: Springer Nature journal article supplement (doi:10.1186/s12884-020-2739-z), 2020-02-07
Supplement: MOESM1 [file 17660970]

# WRITTEN SURVEY - CONFIDENTIAL

|                         |             |
|-------------------------|-------------|
| Location: _____         | Date: _____ |
| Participant name: _____ | Age: _____  |

## 1. Your Background

|                                                                                                                                                                                         |
|-----------------------------------------------------------------------------------------------------------------------------------------------------------------------------------------|
| 1) What is your role? (please circle)<br>Nurse                      Nurse aide                      Midwife                      Doctor                                                 |
| 2) What are your qualifications? _____                                                                                                                                                  |
| 3) How many years of work experience do you have? _____                                                                                                                                 |
| 4) What is your current place of work? (please circle)<br>NRH                      Gizo                      Kirakira                      Good Samaritan                      Kilu'ufi |
| 5) How long have you worked at your current place of work? _____ months _____ yrs                                                                                                       |
| 6) List the places you have worked in the last 5 years: _____<br>_____                                                                                                                  |

## 2. Neonatal Experience

|                                                                                                                                                                                                                                                                                                                                                      |
|------------------------------------------------------------------------------------------------------------------------------------------------------------------------------------------------------------------------------------------------------------------------------------------------------------------------------------------------------|
| 1) Have you had EENC training? (please circle) No Yes                                                                                                                                                                                                                                                                                                |
| 2) When did you have you had EENC training? Year _____ Month _____ Location _____                                                                                                                                                                                                                                                                    |
| 3) Have you had EENC refresher training before? (please circle) No Yes Year _____ Month _____                                                                                                                                                                                                                                                        |
| 4) Have you participated in EENC Health Facility Strengthening? No <input type="checkbox"/> Yes <input type="checkbox"/> Year _____ Month _____                                                                                                                                                                                                      |
| 5) Have you had any other neonatal training before: No <input type="checkbox"/> Yes <input type="checkbox"/> (circle below and write year)<br>Integrated Management Childhood Illness _____<br>WHO (Blue) Pocketbook _____<br>Solomon Island National University Training _____<br>Baby Friendly Hospital Initiative _____<br>Other _____ year _____ |

## 3. EENC training

|                                                                                 |
|---------------------------------------------------------------------------------|
| Was the EENC course too complicated, too simple, or just right? (please circle) |
| 1. Too complicated                                                              |
| 2. A little complicated                                                         |
| 3. Just right                                                                   |
| 4. A little simple                                                              |
| 5. Too simple                                                                   |
